# Supplementary material
Source: PubMed Central journal article supplement (PMC3156218)
Supplement: 1107719108_SD01.pdf [file 1107719108_SD01.pdf]

>lcl1A6XKD2\_9PEZI/6-138 (A6XKD2)  
FLEWFSGFVDAEGCFHIKEFVIKLVNLLVKFIHETGIGRIATTFEVGSLIDLSKVLDFLSFKKAFYKLLG  
LFEKGSFIIQTPKFEIENEKEFLINFIQHLKAKVTGIDFFYNKSKDFEICTICES  
>lcl1A7LM72\_FUSOX/47-179 (A7LM72)  
FLAFLVGLDGDGYIITKLVISLIDISTLEYIHSTKLGSVNVLVINRTVLPNLRINQFNAMHILKNWIVG  
FTCSEGSFFIKDGCFLKQTNLFEAFKLVFFNQFVSVTVINFFSFLKYIQYMKWLSNLQN  
>lcl1Q3T4F0\_RHIOR/50-182 (Q3T4F0)  
FLAMLVGLDGDGYIATDIIISLDLIDINYSVKIGRVNKLITSRITLFPFNREAQFDKVMFILQNWIVG  
FTIAEGSFVVDICFSLKQELLFEAFKIIFYSKFMVSQKVVDFSFYKLTQYNLWLNIRE  
>lcl1Q6UVR9\_PSEAK/23-155 (Q6UVR9)  
IKPFFVGLFEGDGCISTQVLTLELNISMLKQISGFHVSKGRKWRVSNCLKFPKRLQLEHLQRCDLPWLSG  
FIEAEGCFHSQGSFISRNWTWYILNAIKTYFYVIQMGGSIIAHFKQYKDVSKAFCKYGTG  
>lcl1Q6UVV4\_PSEAK/49-181 (Q6UVV4)  
LEPFFVGLFEGNGCLYMRVLQIDLNEAMLKMIASHGTIQYEKKWLAIDCLSFPKICQLNHLKQCIKPLWLSG  
FTEAEGCFSTRLSFYISQWYILNAIKTYLTVQYRVSEINVHFSQYKKSISYESFCQFYFA  
>lcl1Q9T2T0\_MARPO/24-156 (Q9T2T0)  
MKQFFVGLDGDGSIQVNRIIKLNHMLKQLSKVNIQIYIQLDHTVVLGLPAYTRYLFLRFLCNWVFG  
FTTAEGCFIRSHSFSISQYIMEAIKTKFPYILITARVIDFFSREKLLQFHKFIISAFYK  
>lcl1Q3T4A6\_SMICU/31-163 (Q3T4A6)  
LEKFLVGLDGDGCITVFLNLMFNLLKLLKEMERKDYVYIESKKTLLPKICQLEYFKFLGWLWLSG  
FIEAEGNFKLISRQFIQKYLIIKTYLPLHYRISNNLKHFKENKLLSYNIWYNSFKV  
>lcl1Q950P9\_9FUNG/4-136 (Q950P9)  
LTFEIGWFHGDGDGYLGEINFNDKDLILYLMKESNIGNISERYRISKILPINTKHIYQFKQAHINWLG  
FFEAELAFYVSRAGWSVTQPLVLEAIKEYMGTNRQLSINIISSSNKYKLLQYNKWCNLSN  
>lcl1YMRFL\_YEAST/85-217 (P03881)  
FYKLVGFTDGDGSIYIKFYGRMDKACLEKIRNMNMPNSFEMLVNSQIVTFPKYYSYKWKMMAMIIWILG  
FIEAEGSFDTSICGFNVSQINTLKAISYVDSIKLTFNRMDFLYRKEIDFQLWKTMEI  
>lcl1A5J038\_GIBZE/134-266 (A5J038)  
DPSYVTGFTDGEFSFILTRFVLSLVLNLSLKNFNTGVSFLQYRVESIIINFPKQADYMLFKLAYNLWLAG  
FTDAEGCFVSVKLSFIITQEFLIKSLIEYLAIDFVKSNIIPFYDKNKSDFKDFSRVVTL  
>lcl1YMN3\_PODAN/143-275 (P15563)  
NPSYISGFVDGEGSFMLTRFVLSLVLNLSLKNFNTGVSFLQYRVESIIINFPKQADYMLFKMAHFWLSG  
FVDAEGCFVSVKLSFILTQEYLIKSLIEYLTIDFKVTDIIVPFFIKNKNLDFDFCEVVR  
>lcl1Q35928\_SCLSC/134-266 (Q35928)  
NPWFLTGFDGEGCFRISFFQINLDIALLEDIRDYGVGMHKKYRIQITLILNPKKWFELFKQAHEHWFSG  
FTSAEGCFMVGYSFVITQELLKLLIDYFVYEQVSEKIDFFDKKSKDYLDFTVSEI  
>lcl1Q4VWWS\_0PHNO/423-555 (Q4VWWS)  
NPWILTFGDAEGSFLRGFQITLDSKILENIQSTKGVIANSLKVTTRVIDFPKLDGYMLFKQAFCKWLAG  
FTSGEGCFVNVQLVFSITQKMLNLSITYLWLDVFTDKIIPVQEVKLEDFEDWCKVAKL  
>lcl1Q02694\_PODAN/133-265 (Q02694)  
NPWIVVGSDAESSFMIRVFSIAVDLFLLESIKTFGLGSIKSYRIESFIIPFKLDGYLLFKKVVENWLAG  
FVSGEGCFKSIILIFVQTEKLMESLISYFWLSYIVSTKIIPFFLQSKNLDNDWCKIATL  
>lcl1Q7YEU6\_SACSE/415-547 (Q7YEU6)  
MHSFFVGLFEGDGSIQVNRILVILNMMNLTIMNYGTMKINKVMNNSKFIIDFPKRYQLAFMKSMFENWVFG  
FIEAEGCFNRNYSFSSQKMLMLFLKNYFTYILEVYMFICDFFNKYKLYQFNWNNYKCH  
>lcl1Q6DN58\_KLULA/138-270 (Q6DN58)  
YKMLFVGLFDSNGNIQINRLIILNINILNIIKHYNININININDIKNLKFKPKLQLAFIKSIYYWVFLG  
FIENKGFIIIRNNSFLYIKHLEIFLKNFYIYILEVYNIKFFNKLQGYKYEIKWKKI  
>lcl1O20960\_CRYPA/124-256 (O20960)  
NPWFLTGSDAECFSFVFAIGLDELLEKRIQSYGVGKIHIQFRIDSVIINFPKWADYTLFKKALDNWISG  
FASGDSSFNKQLRFGIGLQALQYLVAYFSARFVVDKIIIPFDKKSLLDYINFKEVADI  
>lcl1Q00IP1\_OLTVI/28-160 (Q00IP1)  
FGPYLAGLIEGNGSIYVPLLTIRFDLPLAEKIKEIGARSSYHKNTKSLVIQIWLTCGFFRTPKLVDSWLAG  
VVDSTGNFYVNNFRMAEQFPIMSKLARYFCIDNRIDQKVIDYFYKSKRLDFTLWVEIKRI  
>lcl1B3GTB2\_VOLCA/11-143 (B3GTB2)  
IKCFVGLMDGDGSIQVNRMIKLNIRMLNQAIAVGVTVQCVLWVVDNIVKFPRLKQYFLKSLAWISG  
FTEAEGCFTRIPSFISQLELLFLALYFSYFLFETISICAHFNKAGKKSDFEKKLS  
>lcl1Q36472\_PODAN/60-192 (Q36472)  
NPSFISGFSDAEGSFVTRFQIKLDRALLLIQNYGYISTLKEFRVSDIIPFPTYKDFIIFKQIVSNWVAG  
FSAGESNFITWLRFSIAQILLKSLVEFFVCEFIVTIYIIPFFEKSKYKDYVNFKEAAIP  
>lcl1A5J036\_GIBZE/56-188 (A5J036)  
NPWFVTFGDAEGSFMHTFQIKLDELLEEKIYNTGSINTVYKRSIISFNKADKDFLKIINEWMAG  
FVSGEGSFSVYSLSFRVSQKQLKSFVDFKAVIFVTDKIIPLFNEVKYKDFKDWLSLAKM  
>lcl1Q6U7W7\_CRIPE/39-171 (Q6U7W7)  
DPWITGTFDAEGSFLYVFSISLDRDILSQIQNFGGGHSKYTVKSIIDFLKLDNYLFLKLAYNYWVSG  
FTSGEGNFMDGLRFTITQKQMLISLIDFFCFNLITRTKIIPFFSKDKLLNFQNFIEASKL  
>lcl1A5J035\_GIBZE/133-265 (A5J035)  
NPLFLTFGSDAESNFTVRVQIELDLNLVLEKISSFGVGVKIYHMVQSLRVIINFPKLEDFLQFSQIVTYWMAG  
FVAGEGCFIRQLRFNVTQKVFMSLVAFWKVDQFILDKVIPLFQSVKSKDFADFCKAVIDI  
>lcl1Q8HHC4\_CRYPA/181-313 (Q8HHC4)  
NPGVWSGLDGEFSIIFKQLGLDYDILSQLQFLGAGAIYLYNYMISSKLLLPKSTDLFLFKQIIDSWSG  
FVSAEGNFVDRQLRFRTQIKLMEVSLVQLAVHLSIVNRIIPLFNEVKSVDYKDWCKIHEL  
>lcl1Q9XKY8\_AGRAE/8-140 (Q9XKY8)  
TGDWISGFTQSDGFSVVSFNITQELMFKALHKGIGKIYTRRNITFLAYTFSKEKHLTIEGTLQEFVRG  
VVDGDGFSFNISVANFTVVTIISLNQLVDFFAARYQVQEKIIPFINKKQERFEIIVKVCRL  
>lcl1Q6V9C2\_PENMA/88-220 (Q6V9C2)  
WLWILIGFVEGDGAIQYRVRFVLESAIYFIHKNIGVVKHRLIVDNLAFFLRIKQLSLWISQLNAWLSG  
FTDAEGCFNVS KMRFILDQSIIITKIRDLVFRYTVTNNIKNYFERKKADSFKWCIIHDM  
>lcl1Q85MA9\_9FUNG/42-174 (Q85MA9)  
VQQFVWGLMDGDGSIQVNRMIKLNRMNLNIAEHGKHRPDRWVVDIITRYPRMVNKLAFMRECIAWISG  
FIEAEGSFNTRNHSFISITQPHLLHYIRDYFLSRLEVYLRINHFDDKADISFAKWAELVKL  
>lcl1Q8W9R2\_MESVI/5-137 (Q8W9R2)

NFYFVWGLMDGDSIQVNRVFIKLNHQLTQFCQCMGGRITNVWVNDRLANLPEFLKENLQRNNIDYWISG  
FIEAPCFTIRNHSFISLRLVLEKIRDYFFVYLEIYELFISINHEKKISFKYFQSVML5  
>lcl|Q33761\_ALLMA/84-216 (Q33761)  
RLEWIFGAEADGAILAFRLRFVLEGAILYQIQRVGFGNVVFRYVDSILFFFLRISQLKVVYDRLLAWVSG  
FTDAEGCFVSVVVKLLDQFSVLMHIRDLFVRYTANTPIINYFTAKKAISYNKWEIVKM  
>lcl|Q33639\_AGRAE/108-240 (Q33639)  
NPWFITGFTDAEGSFMVSSFAIHIDISLLNQIQKTGVGNVRKLRVDVNIINFPKASDYIIFKCKCNYWISG  
FASGDSTFSVSRILFGTCLKELLIGMANYFTSLQIKDIIIPFFNKVKHLDYDFKLSNL  
>lcl|Q02692\_PODAN/138-270 (Q02692)  
NPGVWSGLDGEGSFSIIFKQLGLDYDVLQLQLFAGGAGIYSNYIISSKLVVLPKSVDFFFKQIIDSWSIG  
FVSAEGNFDVRQLFRFRITQIILMEKLVQYLIVDFSLINRIIPFKEVKSDFEDWCKIHLEL  
>lcl|A7UG12\_PHANO/102-234 (A7UG12)  
NPGVWSGLDGEGSFSIIFKQLGLDNLCLLQHQHIGSIHNLNYSIDSNLILLPKAADFLLKKAVEYWISG  
FVSAEGNFDVRQLFRFRISQLLMQKIVEYLIVDFKIDINLVPFFDEIKLHDYLDWCKIHSL  
>lcl|Q35135\_NEUCR/136-268 (Q35135)  
NPWWSGLDGEGSFNIIFKQLSLDNLNLLYLLQYQYIGSIHNLNYSIDSKLILLPKAADFLLFKQAVKYWISG  
FVSAEGNFDVRQLFRFRISTIRLMEKIVEYFAVSLTIVNLPVFFNKIKLYDYLDWCKIHSL  
>lcl|O47564\_AGRAE/110-242 (O47564)  
FYQLVGFDTGDSFTSVSLTYKINLRILHFIKQKVGSIYIHFIRIDVIFPFSKHFNYIKFKAQAWLIG  
FTEAEGSFYLVVHGFETIKKIVLIAIKHILFTVTTENIINYFKMKISIEYRIWSRAYVK  
>lcl|A5J058\_GIBZE/104-236 (A5J058)  
FHQLVGFDTGDSFSIVTLFFKLNRAIHFIKQKVGSIYVDFRIRDILPFPKYFSYLKFKKAYEYWLIG  
FTEAEGSFYLVVHAFETIQFIVLKAIAHILRHTVTTNSIIDYYSKIKAVEFRWIWSRAYVK  
>lcl|Q3T4F6\_RHIOR/77-209 (Q3T4F6)  
FQQVLVGTGDSGSFVSLTLTFKINLRALYYIKQKQVGSVSVSFRIRDILPFPKYFNYAKFKSAYASWLIG  
FVEAEGSFYLVVHGFETIQRVVLEIRHILHYMIDTTSNVSKYFFNMKGVEYRIWSRSFNK  
>lcl|A5J042\_GIBZE/12-144 (A5J042)  
NPHYVTGDSGESCFLSGFTIIVLDELLRSIQSFGIGNLKVQYRVFSIILNFPKHTDFFLKEALAYWVAG  
FTDGECCFWIKVIGFQISQLPLMEKISFAYSLVVTKEIIPFYMASKSEDFKDWKRAVQL  
>lcl|A5J063\_GIBZE/116-248 (A5J063)  
DPNWTGFDVDAEGCFSTISFEINLDEQILVSIKSFQVGVQYNIYRVNINIPFKALDFLLWSKVIEQWVSG  
FVAGDGGFSIYSCRFHIAQLELMKLFKFFRCDFVQEKILPHFDTLKQDYLCFKCECVSI  
>lcl|Q8SHQ9\_TRIRE/1-133 (Q8SHQ9)  
MARPQGGFSDGEATFTNFYIITLDLPLLALIQKYNQQLQILTISSAVIKFPLVDYLLFKQVYTYWLAG  
FTSAGHFGVKVLFKTLTQKLLLENFISFYWGVFEVTSIIIPFFQKVKAKDFASFCFICKM  
>lcl|Q02693\_PODAN/55-187 (Q02693)  
HPWFITGFTDGECCFWIGFQIALDEALLKAIQKYGIGAVKITFVSSVIIIPFKLADYFLWKGIIEMMAG  
FTSGEGSFFVNRLEFEIAQELMLLSFTEFFMVKFRCTTIIIPFFKKNKIKDFQDFCKVCEL  
>lcl|A5J046\_GIBZE/53-185 (A5J046)  
HPWFITGFTDAEGCFWIGFQIALDVALLNINISYQYIGTAVVYFVSSVIIIPFKIVDYRLWKSIIEMMAG  
FTSGEGSFFVNRLEFEIAQELTMATFTSFFMVKYRCTTIIIPFFKKNKLDFFDFGKVALL  
>lcl|MBI3\_DEBHA/262-394 (A9RAG7)  
LLALMVGFMDGDSYIRMNLSLIMNLDLKLQYFHQQNMKGVYNKLARWEKLDLNPYHNMKFLTETRONLWVG  
FTMAEGSFLIKDIFCQLKQLEFNNMTLFFYMQFNVSQNMNINFFSNKLSYNKWLFTIKN  
>lcl|Q5EM51\_9FUNG/8-140 (Q5EM51)  
LTFWITGLTEAEGCFNINRFSIAVDLELLKLVKDCNCGTISERYFTVSIIPFLKLDFFEDVWLAANNYSIG  
FIAAGDSINIHIFLSITQFLMNEIKDFSVQLLIESTLIPFFNKIKLINLNKIKILEL  
>lcl|Q950N2\_9FUNG/92-224 (Q950N2)  
FLAWLSGFTDAEGCFQIVRFVIGTRPPLLELYMSQNTGTITNTRISHVILPFPKSLDFKLEAFIYIWLIG  
FVEGDGFSISKNSYFISQQLIYIEIKNLFQVLSLEITSILPLFYSRKQIDDFRFFIVWQG  
>lcl|Q3T4D3\_SMICU/10-142 (Q3T4D3)  
NPNWVTGFTQADGCFNITRFIISQDELLLSIKNFNCGIIKQYVNSIIPFPKYTSYLFKNIIENFIGG  
LIQDGGCFNISQAQLFIAQIELLESEIKFFIIEIKNINKILPLFNEDKQKQIIFKQIVNL  
>lcl|O20958\_CRYPA/58-190 (O20958)  
FYQWVGFSDGESSFQISQFTISLDAVLFKIKDKIEGNITVVSFTNKLISFNKLYLDLDFRKAFLNLLG  
FTEAEGSFFISSIELSNAQDFLISDLGFDGSAILLIKNYLVPYLSKGGQDFEDWKLICEA  
>pdb|2AB51A|pdb|2AB51A|gi|175766112/16-148 [Saccharomyces cerevisiae] Bi3 Laglidag Maturase  
IYAYIVGLFEGDGTIISELGIEXDIQLLYKIKNIGIGKVTIKFNVRNIIPFPKYHYDYLFKONLWSLIG  
FFEAKSCFIYTAISFEVXEXVLAIKSYLNSKXTTKNVVXFINNYKQLYLLFLKDLRT  
>lcl|Q32X64\_AGRAE/34-166 (Q32X64)  
FSLWFSGFIDGEGNFQVIFRIRLDIALLFKIKKFGVGVKVSITNTRDIVLLPLKKWLDYIDFLKVINWLLG  
FIEGEGTFGKTPYFQIQQLKVLQSIALLSAPLILSNNIDSLDYRKGVDYFLWGIALHF  
>lcl|O47502\_VENIN/98-230 (O47502)  
TYAYLVGLFEGDGFVTELIELDVQLIYKIKDLGVGVGFYKVRKNILPFPKQFDYLRMRITILLAWVG  
FMEAEGCFSVYASFEISQELVLAIRKLFNFKLKVSENVIKFIDRNKQLYIWIWIKLRT  
>pdb|1P8K|Z|pdb|1P8K|Z|gi|42543265/5-137 [Emericella nidulans] The Structure And Dna Recognition Of A Bifunctional Homing Endonuclease  
And Group I Intron Splicing Factor  
TYAYLVGLFEGDGYFTELIELDVQLIYKIKKIGIGIVSFALRIRDFLPPKQDYDLRFRNALLAWLIG  
FTEAEGCFSVYIASFDIAQDILISAIRKYLCSKLVTEINIKFLQNNKQLYLLWLKQLRK  
>lcl|PAN3\_X55026.1/55-187  
HPWFITGFTDGECCFWIGFQIALDEALLKAIQKYGIGAVKITFVSSVIIIPFKLADYFLWKGIIEMMAG  
FTSGEGSFFVNRLEFEIAQELMLLSFTEFFMVKFRCTTIIIPFFKKNKIKDFQDFCKVCEL  
>lcl|Q32Y73\_9AGAR/73-205 (Q32Y73)  
VYAYLVGLIEGDGYFTVTELGIEFDVLEIYKIKKLVGVIVSFLSRVRFVIVPFPKYDYLLFFRSCLFAWLIG  
FTEAEGCFSIYASFDISQELISAIRKHLCSRLKVSNNIKFLHKNKQLYLLWVWQLRK  
>lcl|Q9B6E3\_YARLI/119-251 (Q9B6E3)  
LGPYLTGLIEGNGTISVSSISIVFDKPLCKYLINLCKGINKWQINKLILSTYKYEGYLRATEFNNSWLAG  
FTDADGNFLAAYRLEIRQFEIMSKIGAYLHYSIIMTTNVIKYFDKSKFLDYSNWKYQDY  
>lcl|Q02696\_PODAN/122-254 (Q02696)  
FYAWFAGFTDAEGFYIARFQINLDMHVLFIQKNGFGEVRSVTRLDKDLIVFPKWLNYKDFAKAFAYEYWLIG  
FTEGEGCFINRDLFSLTQLELMKIKSYLTVRIETTINLIPFLENKQLDFQDWKIILML  
>lcl|Q950N7\_9FUNG/30-162 (Q950N7)

LGSYLAGLIEGDGSLIVPLIRICFDKPLAELLIEKGYGLIYLEFNFKVTSIFKYEALLRKIDWINAWLAG  
MIDVDGNFNVIQFRLELRQVDIMSVIATYLLNDSITYNLIKIYLNESKYLDYLDWCKIIDL  
>lcl|Q8SHQ0\_TRIRE/165-297 (Q8SHQ0)  
DPNFLTGFDAEGSFVLSRFSISLDFVLEAIKYNVGVGEIYQYRVFSLVIDFPKGDYSLFKQAYLQWLAG  
FTSGEGSFVGVKELIFQINQKQLMACIAEYLAIVYRVSEKVIPIFFIKIKALDFKDFCSLAEL  
>lcl|A5J075\_GIBZE/63-195 (A5J075)  
NPDYLTGFVYEGGCFSLIFSISLIDIKLLEAIQRTKTGKIYKQYRVSSIIITDFPKRADYLLFKQAIANWIRG  
FIDAEGSFQVLSRFSLTQEELKIDITTYLEGQYLVTDKLIPLFNEIKQYDYLDFAQIAEL  
>lcl|Q35375\_PODAN/9-141 (Q35375)  
FYEWVAGFIDAEGCFHIKEFVILKDEAVLRTICHHVGRVLSFEVGSILIDLQKYLDYINFREAFYKLLG  
FIEGEGSFIVQTPKFELELKPILLIDICEYLSVRLIEITNYFNFLSKRKKEDFKSFCFICNK  
>lcl|Q7YEUS\_SACSE/80-212 (Q7YEUS)  
MKEWLVTGDDGDTFNVIYKISLNMELLYKIEYIGITINMSYLIRDIVMPFKRFNYLKFKECLMSWIIG  
FIEAEGSFITVHSGVGTQDPILLSMKYLYKLETTETIIEYFRYMSKFEYRIWTRTYLK  
>lcl|Q8HIS8\_MONBE/8-140 (Q8HIS8)  
EIKWAIIEADGYIGFYTLKVSINIKTYKLRIGYSHKITTNEHILPLNKYYQVMYLDKAINWWSG  
FIEGDSFKINQIVFELQSFIIWLIHKYTKDPKIIKLIILLKGIKISFEYSIWARFRT  
>lcl|AI2\_USTMA/255-387 (Q08X8)  
FKEWLVTGDDGDTFYFASFQIGNIRLLYYIKSMGIGSVVHYRVRYILPFPKYFNDFLKKAILSWLIG  
FTEAEGSFYIVVHAFIEIQHIVLEAIALILYMTVTTENIISYFFKMALEYRIWARSFNK  
>lcl|Q8HQ87\_SCHOT/119-251 (Q8HQ87)  
FEQWLGIIIDANGFYINYFKIINPLLYIKSRGVGWIRLQLKNPKSILPLPKYFYIKFNALLSWLIG  
YLESEGNSIMVHVFIIKISILRSIALILQTYIMVTLSLIHYLKNIKSLEYRIWARSFNK  
>lcl|Q6U7Z6\_CRIPE/105-237 (Q6U7Z6)  
FEQWLVGTGDDGDTFHFSILNFKINRLLYHIKSGVGVKVSVEYLRDHIIPFPKYFNDFLQAAFSWLVG  
FSEAEFSYLIVVHAFIEITQKIVLDSIGYLLYFTVGTTSNIIYFHKMSLEYRIWARSFNK  
>lcl|Q6V9C4\_PENMA/91-223 (Q6V9C4)  
FEQWLVGTGDDGDNFHIANLGFKNARVLYIKKEGVGSITKQFFIRDVLPFPKYFDYMKLKKALYSWLVG  
FIEAEGSFYLVHGFGLTQKVLEISIRILLHYLIDTTENIIEYFNNVKSLEYRIWARSYVK  
>lcl|A6XKD3\_9PEZI/37-169 (A6XKD3)  
FLEWVGFDAEGCFHIKEFVILKNVALLKHIQESGIGRIASFEVGSILIDFEKYLDLFSFKAFFYKLLG  
LFEQDGSFVQSSKFEIELRPLLESVQNYLKAHLKDENLIIKINSARLSTYKEETKYLTN  
>lcl|Q36465\_0PHNO/14-146 (Q36465)  
FLEWVGFDAEGCFHIKEFVILKNVALLKYIQEFGIGRIASFEVGSILIDFEKYLDLFSFKAFFYKLLG  
LFEQDGSFVQSSKFEIELRPLLESIQNYLTVRLTVTLKNLKFFTIKDFESFSLICKVLFN  
>lcl|Q02690\_PODAN/78-210 (Q02690)  
HPEWITGFTDGEFSGIFKFFQIKLDDILYRIKEYVGTISFKYIIRKILIPFPKADFELFRQIILEWLVG  
FIDGEGSFNIWLFHQITQTLMERIVTFFAVDFKLNIIIPFPKAKVDFLFSIEAANV  
>lcl|Q9B6E5\_YARLI/407-539 (Q9B6E5)  
ILPFFVGLFDGDNQIVNRLVIELNVRMLNITKEGKISFGSMNDAQKCNFPKRYQLAFLQTFYNWVAG  
FIESEGSFSLRNHSFSQYELMLYCKTFFSYLLECYDKFTIFFNKGKLDQFIEFKNARD  
>lcl|O20959\_CRYPA/42-174 (O20959)  
NPWFITGLVDAEGSFVNNYFEIALDRDLLTGIQDYIGNITFKLVKSVGIVIRFYNVPIQLFSRVVWVWLAG  
FTEGECFFIPQLAFTITQKELNVIAQFLACDFIVNKKIIPFNKTKSLNYQDFVKVFL  
>lcl|YMC1\_SCHPO/107-239 (P22191)  
FTQWLVGTGDDGCFISLSTFKLNYRILYFKRNGIGSLYKIRLRKIIDFPKYDYLLFKKAFSLWLVG  
FIEAEGSFYLLIHGFEITQQLLAQISEFLNYSLSKERMFLSSVKSLEFKIWSRSLRK  
>lcl|Q3T4A5\_SMICU/96-228 (Q3T4A5)  
NLQWFIIGFTDGDGCFVYEFISGLDIRLLYKIKNLGCGTKVVKFRKIKQIIPFPKRYVILNFRNTLNNLVG  
FTEAEGSFYIKAEFRLSQVILLTKIKEKLYIVASIQNTIYFYIKYKFLWLGKIKN  
>lcl|Q02704\_PODAN/107-239 (Q02704)  
FLEWVGFDAEGSFVNNYFEIALDRDLLTGIQDYIGNITFKLVKSVGIVIRFYNVPIQLFSRVVWVWLAG  
FIEGDSFFIRTPTFSIENLPLVLLKIKEFLSVSLIINNYLIPFFSHKKGDFNDFKISKA  
>lcl|A5J033\_GIBZE/141-273 (A5J033)  
NPWFITGFTDGDGFTISTFTIGLDDILIQFKAYNAGKIYKYITIGSHVLPFPKLDYLVFKRILLDWLAG  
FITAEASFISLVSQDLKRIADSLAVELVITQKLTPLLSKVLLDFERFKKASL  
>lcl|A7KCU3\_PLEOS/30-162 (A7KCU3)  
IEQFFVGLLEGDGTITNRIVIALNHNMLNKIQKGRVIERWIASNKKVLLLPKQCQLDFAKNSLSWLVG  
FIEAEGNSLICKSSFIQQLHILNMIKNYFHYRLHYKLLFQHFKEKKISYKGFDFHMK  
>lcl|B4Y548\_9ASCO/8-140 (B4Y548)  
FKSWLVGTGDDGTFKINEYNITQKEQLLHKIKKEKVGKIIKSYIIRDVIFPFPKYDYIKFKECLLSWLVG  
FIEAKGRFIIINHIFISSPIIISIKYIFIFNMIETNIIIRYFIKIKSYENLWKSXYLN  
>lcl|Q8M1D4\_CHAGL/25-157 (Q8M1D4)  
FHEWLVGTGDSGCSITQCTFKINRYVLYIKKNGYGSITQYICIRDIILPFPKHIVYLVWKQALLSWIVG  
FVEADGSFFLVHTVFCITQYALLEQLKKRFAYVLETTTRFLIQFFHGMKSLEYRIWARSFVK  
>lcl|Q950N5\_9FUNG/95-227 (Q950N5)  
FYEWLVGTGDDGFTIDNLYKVNFKILYFIKHSYGNITKCFRIRDVIFPFPKYDYIEVKKAYLPWVIG  
FWEAEGSFYIVCHGFGITQKILFLQSKIFRANLNIIVDEKINYFIGIKSLQFTIWRRLTKF  
>lcl|O20957\_CRYPA/26-158 (O20957)  
WIRWFTGFCDAEGNFQYGFHLSLDAELLHVHDKNMGVYEEARIAVIVDFPQYTRYCLLKEYLISWIVG  
LNGEGCFYLNFIETHDLQLEIKKRLSFSYMLIVSESLIELLDSHKLMOYNEKHTWFN  
>lcl|Q5K464\_LACTH/214-346 (Q5K464)  
MNEWLVGTGDDGTFNIYTKISLNTQLLYKISYGVGSVTSYLRDIIIPFPKRYNYLKFKECLLSWLVG  
FIEAKGSFFITVHSELTQSIKLLNINSFYKLETTETIINYFRYMSKFEYRIWARSYMK  
>lcl|Q85QA1\_CANGA/91-223 (Q85QA1)  
MNEWLVGTDSNGMFIYTKISLNIQLLYKIKNYKIGSINYINNNIILPFPKRYNYLKFKECLLSWLVG  
YMETKSSFKLIINMMKLDYSIKLLNININNYKLETFEYIINYLFKMSKYEYIWKRSYK  
>lcl|Q36232\_WILSA/55-187 (Q36232)  
KYNWLVGTDAEGNFNMFAMNLDKMLNKVLYIKNTLYEGFKVSNKVMPLPKNYDFETYCAHDYMWVIG  
FIEGDSFHNLLGFKLQGINALMSTINYIPIYLDGKWQLMPYLLKRWKDYLDIWIIVVII  
>lcl|Q85MA7\_9FUNG/40-172 (Q85MA7)  
FLAWFSGFTDAEGSFIVQFRILDRSVLDYIAKTGIGSVFMVQVSSIIIPFPKYDYDFKFCQAVNYWLVG

FIEGEGTFGIKNSMAQFLTRAISTPIIHVVITYSYADYLLPFFLARKYVDFYLWAIIVIC  
>lcl|Q950N0\_9FUNG/21-153 (Q950N0)  
CKIFWVGLMDGDSIQVNRVFKLNKNMFLAKNGNRIISWVENDIIYESPRKYYQLLLKKKFIWLSG  
FIEAEGGFSIRNHSFIEQKFLLIYIKEYFTNFVLEVINNHFSKEKKISYLRFDLSTMS  
>lcl|A5J050\_GIBZE/93-225 (A5J050)  
FGWEFRGVDGAEFCFSIQITFCLEPLIKYIIQGVGAFSLNFTVSSVIFGLPKNLNYLAFRQAYDYWLLG  
FVEGEGYFSTNSLKFQIIVLEAIQKYFMAQLVITNVIIPFFDKKKFKDYVDWKLILD  
>lcl|A6XKD1\_9PEZI/6-138 (A6XKD1)  
FIEWFSGVDGAEFCFHIKEFVKLNVLVFKIHEGTGIGRIAITFEVGSILIDLPKVLDLFSFKKAFYKLLG  
LFEFGDSFVIQTPKFEIELKLLNEIQKYLIDQLKAKITGDIFLNNDKSKDFEICTICES  
>lcl|B2XX70\_9MYCE/18-150 (B2XX70)  
IGGYLAGLYEGDGHIIQITFNIDQNAQMLIEGSHGYLTLKLTIGTKIEMQVNDLIKWLNKNHGWLSG  
FLDSDGNFMIRACRVRIDQEPIMSASQKLESYFVVELNLSNYLYKTFYDFLNWNECLQL  
>lcl|C5GYN7\_AJEDE/76-208 (C5GYN7)  
FEQWLVGFTDGDGNSITGLSFKLNRLVNYIKKEGVGSITKQYIIRDILPFPKYFDYIKFKKALASWLVG  
FIEAEGSFYLVHGFGLTQKIVLQIGLMLHYLIDTTENIIVFFKDVKSLEYRIWARSYVK  
>lcl|Q3T4A8\_SMICU/129-261 (Q3T4A8)  
DLEWLGFTDGDGFSIKSRLYVLEIKLIIYIKSLFGKVVYIRVYVTKILKFKKCKERFKIWNNEQWGLSG  
FIDAEGCFNWRNRFMIDQSEVLKQIILLTERLTDPKLIDYLEKKRITFFKWRKIYLL  
>lcl|Q8SMI8\_9CHLO/4-136 (Q8SMI8)  
TDKVVVGFVDGDFKIIICFVVSQSVNVLALKKKGGCSVNRKVSCKIILPFPKLDKDFQILYEDLTDWLTG  
FIDAENFHVQSQVIGLHLKEILESIGNMMSNYLVSSLTGFLEISKRIDFLKFKQIIRI  
>lcl|Q8WL00\_9CHLO/14-146 (Q8WL00)  
SYKQFVILDSGDIRTEIYFSINKDVLQEKIKLGGQIITILNCLAYLIAKIKIQYLLINLCYQAYMSG  
FYIGDGSFVGNRPVWISDRLLLESFQRTLCFYRVATVLPILDNRMEQFKFKKICNI  
>lcl|Q8M0D4\_AMOPA/78-210 (Q8M0D4)  
TPFFVTITDAEGCFVGSFISITLHDEALLKQLLSFGKGGIFRRFESKNVAVFKPQADYLLWKKAVEEMMAG  
FISGEGCFIVEKIFNIPQIILLQVLEYLEFRFQDFEQIVPFRSMKIHDFNDWCQAIDI  
>lcl|Q02695\_PODAN/86-218 (Q02695)  
FLHWFSGFTDAEGNFIISRKISLIDLKVLQVQSNIGRITVSRCSFTICSPFKLDFQDFYALLNWFIG  
FMEGEGTFGKSLYLQVQALIALSNNTKYFVSVLVSYIILPLDERKFEDFKLRMALIL  
>lcl|Q7YEU8\_SACSE/25-157 (Q7YEU8)  
FNWVVVGFVDGQWLYISKMGWITDKVLEININKVTNISINNAIMKHQVVIPLPKYYSYIKWKEQYLSWLG  
FIEAEGSLNFYRATLSITQETIMKLMNSWAVYDIHITHIVLPQLKSRKMLAFQIWEIVLTI  
>lcl|A7LCP3\_YEAS7/92-224 (A7LCP3)  
FHKVLGFTDGDGFSYMKFYGFHLDISCLEHKNLNNINILQVTKNLLPFPKYYSYMKWKEALMHWILG  
FMEAEGSLTIESCKLFIQSYLLNWNMIVINLTAYVIIPKFNKIKYNSFMNWQSIINI  
>lcl|Q950N9\_9FUNG/24-156 (Q950N9)  
DKAYFVGLDGSFVHVEKYSNLNPLNMLNKNQGVIIHSILKFSVUIPFDLAQYKYFYHLLDWLIG  
FLEVKCFFTYVYASCEVSLIELLEAIRYVJQNKLIKISIEFIFLDRLRKFEYLLFLAKAVK  
>lcl|Q6UVV1\_PSEAK/16-148 (Q6UVV1)  
SQLWAIIGLIEGDGHIGLVLEKVTLNTRAIYKKECGVGIKSRSLRVRSHLIPFPKYDYAIVKALTAFAK  
ARSQTLSCGSLQGSLLPTTQVLAHFIRKLRQAEVGFSGQLIENLKLKPKTKAYRNKLSWKS  
>lcl|Q3ZJ06\_PSEAK/40-172 (Q3ZJ06)  
FLEWIFGFEAEGSFLVWRFIDIDPGLIYKIRTRGFGKVVDRFYVNRKILFLKRNQFANWHLINAWLSG  
FLEGGGFVWSRMKFIYITQMAVLFKITSKITSKLESHFLVLKYLEQKRAIQLRRWSRLVKY  
>lcl|Q7YEV1\_SACSE/73-205 (Q7YEV1)  
DIYWLTFGFEAEGTASVTEYRIELDLAALKFIMDEITGITMMNRVKQLTNFPKRFVSTFNHRIYYWLG  
FLEGGSLFPRPGFHLISQEQYELTDIISNECVTYITKVMIPYLYNRKIVDYKMMWISVNI  
>lcl|Q85QA2\_CANGA/74-206 (Q85QA2)  
LGPYLSGLIEGNGTIWVPLINIFNKPLADYLCNMNIGKVYDWQLTKIIFINILKYETLIKLNMMNGWLSG  
FSDMNSFIMMNYLNIKQYLNMMNIANLNNMKNMNNLLVNNIKYLNMMNSLNLN  
>lcl|Q8HMZ3\_SCHJP/74-206 (Q8HMZ3)  
LGNLAGLIDSDALFNNQLFIIFDIRLVNIIKTRGYKIMRLLITPKVINIFVFNQITNMIINPFWLTG  
LAERTIQFQSLNLCQMYHNYFLSLIKNWFYNSINRYKILKYFDHLSMDRYEYLFKFRK  
>lcl|C5K415\_AJEDE/48-180 (C5K415)  
LGHYLAGLIEGDGWFKGLHIIISDASLAYFKKCGYGNIKRYICKDIIISILKYEQLINQGYSEKYWLAG  
FTQADGCFHSRLEYSKQLPLKLLYDILLWICYKSTSDLINYFDKGYLSYLFKRVYIM  
>lcl|A5J062\_GIBZE/80-212 (A5J062)  
FGHYLAGLIDGDGHFSSEQLVIVFDVCLAYIKEYVGFVGNVKKLYIISNRVINILKFNQVLLNIAYPHWLAG  
FSDADASFQIKRLNYQVVRNPILLKKEFFTYGGSTKVINYFDHSHKINYLKWRKAYLL  
>lcl|YMC2\_SCHPO/86-218 (P22190)  
FGHYLAGLIDGDGHFSKQLIIAFDIQLAYYIKKQYGVIRKLFIIANRVITIFKYNQIINNIFAHPHWLAG  
FSDADASFQIKRLNYQIDQEYLLSLIKDNLTYGGSTKVINYFDNSKYISYLKWRKAYLI  
>lcl|Q6V9C3\_PENMA/93-225 (Q6V9C3)  
LGHYLAGLIDGDGYFSKIQLVIAFDFLAYLKEKVVANVKKLLVSKVINIIRYDQIINYINNDHWLAG  
FTDGDGFSQIKRLNYQIEHDLIKKIKFTLYYYGSKNVIQYFDERKYSYLRWRKVVYFL  
>lcl|C5GYN8\_AJEDE/38-170 (C5GYN8)  
FGHYLAGLIDGDGHFSTKQLVIVFDISLAYFIKGGYGNIRKILVIASRVIKIIFKNQIKNINHEHWLAG  
FSDVDSFQVRLNFQINQDTILLIKEFLTYYYESTIKVINYFDHSHKVNFLKWRKAYLI  
>lcl|Q33796\_EMENI/79-211 (Q33796)  
FGHYLAGLIDGDGHFNSKQLVIAFDVSLAYYIKKRGYGVKKILVVTAKVINIIFKNQITNINLNEHWLAG  
FSDADASGAGLRFQIDQEYILLIKEFLTYYYGSKNVIQYFDERKYSYLRWRKAYLI  
>lcl|Q539C3\_OPHUL/70-202 (Q539C3)  
FLTWFVGFTEGEGSFVNDLFCVIDIYILEFIEKETGFGKVISRYVTQNLVHFLRKEQFAFVKGFSWLTG  
FTDGGCFCTCSSFNFSQVILEHLVLFVNEYRIGKNVFPYFENKKSASYSAWKEIHD  
>lcl|Q8HQ86\_SCHOT/87-210 (Q8HQ86)  
FYQWLAGLIDGCGSFKVNEILLPLEEKTLYLQDKGSIKLSRYRLQENLITIKFKQLSHICVINFWFAG  
FWDANLNFELDQLIISNNLVDILFFQIFKDDLLKFRNKINLIKPNYSQHKLVVTLIKK  
>lcl|B6V8R7\_9CNID/71-203 (B6V8R7)  
FGYLAGLIEGDGSIIVSYIFICFDVSTAYYIKKRGFGSMVKNLITVGVVNVFKIESLHKLIIYLNHWLAG  
FLDADGYFQVRRHLHKVDQKDVNLNLEHVFTYYQSTLKVIRYLDKSKWLEYRQWRVYLL

>lcl|Q6UVQ9\_PSEAK/61-193 (Q6UVQ9)  
FGQFLAGLIDSDGHIKDNIAFNDISVAYIYKSAAGYKVRYSRCPKIADILRLVPKLNCDPITYHWLAG  
FIQDGLSLIRIVVAISQERLLTLIKAHFYYYYISNVKFINYLDKGNKLTQYWIWRKAYL  
>lcl|Q3T4B0\_SMICU/19-151 (Q3T4B0)  
FNEWLAGLIDGGDFCLLSEITMDIDEHCLNMKIKRGSIKLRSRYRLHKKIINVINPVRMIQLNKICNGWLVG  
FFDADGSITINQLAISISQTIQLEPLIELYSFKWYITLNLIEYFKKGNLHLIPKIFYEL  
>lcl|A5J061\_GIBZE/83-215 (A5J061)  
FKQWLAGLIDGGDFCLLSEITMDIDEHCLNMKIKRGSIKLRSRYRLHNSLINVINPRLIQLNYICVWGLSG  
FFDADGSITIKQLSISAGQSELLTPLVEQFSFKWYVTLNLIEYFKKANNLHLVPKIYEL  
>lcl|O47565\_AGRAE/43-175 (O47565)  
FEHYLAGLIDGGHFSQQLVIVFDVQLAYIYKISGFGNVKQLYIISNKVISILKFYQVINNI LAHSHWVAG  
FADADASFQITRLTFQIDQKNILFSIKDLFTYYYGSTKVIHLFWYKSLINYLKWRKHTYW  
>lcl|Q3T4A9\_SMICU/33-165 (Q3T4A9)  
FGYLAGLIEGDSINKIYISICFDTPLAYIYKKGYGITLKNYHLRHRLIDILKIIDWNTYIHKIYWL  
FTSDGSGFIKRLSYQIDQDHLNQIKELFTYFQYVYKIKYLDNSKYLNLKWRKTYL  
>lcl|Q2LCQ2\_DICCI/27-159 (Q2LCQ2)  
WDAWLAGLIDGAGSFTLNEIVMELEVDCLAEIKQRTIKRARIYRAHSQIIAVIIPRRQIQLEICKGWISG  
FFDADGTIQLKQLILFKENTMLNEIQCFSTLSYKLDYDFYFKSKKHNLILPQLYDI  
>lcl|Q2LCQ3\_DICCI/19-151 (Q2LCQ3)  
WNSWLAGLIDSCGNIMLSKIEIKLDHECFENIKKGSVKVCRRYRLKHNLEILIPVRLYQVRECKAWISG  
FFDGSIGIVINQLVIFNQIQLTLQQLFKYALYFTLQLYDFKLLIAQYDQLKTLRL  
>lcl|Q3ZIZ1\_PSEAK/13-140 (Q3ZIZ1)  
WDQWFEGLVDADGCLLISEITLDEEQALLQIKQEGSVKLPAPFRYLKAITLCSNRVVLQQLCQAWFAA  
FFDGDGTGYSQQLIISVNAVDCPEFRQIFTYKWSISHKRILLIPEPETPTYKTWC-----  
>lcl|Q34805\_PICCA/98-230 (Q34805)  
FNQWLAGLIDGGDYLGVSEITVALDEKALRQIQNKGSIKIRSYRLHNKLNINIINTKRLPQLHKVCSWFIG  
FFDADGTINYYQLTISVSNYIDLKPFMDFCYKWSIQTDILFFINSKMLCSKYDILINIK  
>lcl|MBI4\_YEAST/404-536 (P03879)  
FNQWLAGLIDGGDYFCTEITVELDEKMLRQIQDKGSVKLRSRYRLQNKLNINVINSKRLVQFNKVCIAWFMG  
FFDADGTINYYQLTISVSNLHDVEYREVFYFKWSINHNIFYTYNKLIDKFYLLYDLFAFK  
>lcl|Q5K463\_LACTH/78-210 (Q5K463)  
FNQWLAGLIDGGDYLGTSEITLALDEKALRQIQNKGSIKLRVRYRLHNKLNINIINSKRLVQLYQVCDAWFTG  
FFDADGTINYSQQLTISVSNHDVEYREVFYFKWSIQNFINDYIKLRLLLCKTFYELKELK  
>lcl|Q3T4F4\_RHIOR/74-206 (Q3T4F4)  
FCEWLAGLIDGDSLQVSEIIMGLNRLCLRYIQDKGSIKMRSRYRLHNKLNINIHTSRLQQLHRVCQNWVAG  
FFDADGTITMSQLSIRVNLQDVYQYKQVYQWSVQSQRLFLIKDADSIHYKAWLDFINR  
>lcl|Q8HQ85\_SCHOT/82-214 (Q8HQ85)  
FGYLAGLIDGGHFSKSGVEIAFDHLAHYIKTRGHGKISEVLRFGLEVITIFTHHFEQIEKNLFWYLSG  
FSDADASFQIKRLNYQDQDYLKLIKELTYYYGTVKVIKDYFKTKLISYLRWRRAYLI  
>lcl|SCE2\_YEAST/324-456 (P03878)  
FNQWLAGLIDGGDYFIVEITVALDEMALKIEQNKGSIKLRSRYRLTNKLINVINTKRLVQFNKVCISWVFG  
FFDADGTINYSQQLTISVNLQDVYQYKNIILYKWSIQMKNLILSKESDSMQYKAWLNFENK  
>lcl|Q8M352\_SACCA/364-496 (Q8M352)  
FNQWLAGLIDGGDYFITEITMALDEMALKIEQNKGSIKLRSRYRLTNKLINVINTKRLVQYVQCNWVFG  
FFDADGTITYSLLTISMTNLVDVQPIKIDILYKWSIQDVLDFINNRLMSQEFYKLLLEMR  
>lcl|A12\_DEBHA/409-541 (A9RAH7)  
FNQWLAGLMDGGDFGTEITVALDEKTLRIQNKGSMLRSRYRLHNNTMNIHMSKRLVQLHKVCSWVLTG  
FFDADGTMNFSQQLTISVNLQDVLPFKEMLYKWSMQLNRMLLNLNMLQNKAWIKFENK  
>lcl|Q5K465\_LACTH/109-241 (Q5K465)  
LGPYLAGLIEGDTITVQRPLIVVDLELANLNLCKGCKVYKWIHDLTLNIMTPKYEAFVRCAEFAWLAG  
MTDADGNFINSYCLELRQFYMSAIATYFTYKTYYSIKVMEYFNKSKHDLDFLDWSKVLIL  
>lcl|Q9B6D2\_YARLI/492-624 (Q9B6D2)  
FVQWLAGLIDGGHFNKSLITMDIQGLLFEIKHGHIRKIARYDLRQNLKVINPKRLLQMNILCKGWLAG  
IIDSIGSIYFNQLFISVSQKHLDPLISYKKEVLNDIRIKMIPKEEVVYAEWISFLDK  
>lcl|Q3ZEG5\_EPIFL/135-267 (Q3ZEG5)  
FNQWLAGLIDGGDYFILTETIMNADVKALNEIKQKGSIKPISRYRLHNSLINVINPTRLQMNILCVWGLSG  
FIDSIGSIYNYQISISLSQKYLLEPLISYNYPLKTTVNLIKDFYLLDIQKFNWVKFKDK  
>lcl|Q02678\_PODAN/26-158 (Q02678)  
LGPYLAGLVEADGSFAVHKLIVFDKPLAEKLSIQVQGIYNSIQNSEKIIHIMKIEALHRTILWFNSWLAG  
FTDGDGNFSTFFRIELRQVSIQGGISYFYSFMVISTKVIDYFNRSKYLAYKDWKYVVEQ  
>lcl|B4XP13\_9ROSI/46-178 (B4XP13)  
FCEWLAGLIDGGDSIQVSEITMGLDPLRLRYIQHMGSIKMRARYRLHNKLMNIHSAQLLQLHRVCQNWVAG  
FFDADGTIGIAQLSIRVTNQDVESGGNIYFQSRKDVISRRFLIEEPDSIHHKAWLTFXDK  
>lcl|A5J048\_GIBZE/61-193 (A5J048)  
FKWMLIGFAEGDGYFVDYLTFKVDCQVLFYIKKSGFGSVSLQYVRDKIINFKIAQFKLFLEAFNAWLSG  
FTDGECCFTASTVRYVISQIEFSQYLAELINTVNVHNSIILNYIKSKKHVSYLRLKVKYEL  
>lcl|Q3T4F5\_RHIOR/86-218 (Q3T4F5)  
FNSYFTGLIEGDTIIVPSPKGRISVQIVFHLKDLKNGLSRILTNLNLVATLMKIKALNLDLWLNWLSG  
FIEADGHFVRECRFELSQLSFMNNAEFLEYKVRTTLVLENYLNLKSKYLDYKDWIKVLDY  
>lcl|Q35136\_NEUCR/60-192 (Q35136)  
FKWMLIGFVEGDSFIYNYLEFRIDAQILFMIEKKEGFGVVRKRYVRDKLISFIRKEQFKLWLNFAWLSG  
FTDAEGCFTCSRLRYILSQSSCMKYLAELNVTNNTSPVYFNKIKYIYFNWIKIYK  
>lcl|Q6U7Z4\_CRIPE/75-207 (Q6U7Z4)  
WLEWFIGFVEGDSFIYNYLEFRIDAQILFMIEKKEGFGVVRKRYVRDKLISFIRKEQFKLWLNFAWLSG  
FTDAEGCFNVHKLRFILDQLEILRDLKTSYRYTSNPIIVNYFNLIKKEAFQKWTDIYSM  
>lcl|Q3T4B1\_SMICU/24-156 (Q3T4B1)  
FLYWLIGFTEGDFCINELSFILNIELLTIQTNMGNLIKRLIQKLLILFLRVQFNLFNLFNTWLLG  
FTEAEGCFTISSKAFRTYGDINLPILSYLSYIISGFIYYPYFDKIKGLSYLAFKQLNER  
>lcl|A14\_USTMA/264-396 (Q0H8Y0)  
FGSYLAGLIEGDTIVVPSVQIVDFPLCQIVQKLGHTISKILTINNELSNIKYYQVLLVEYLNWLSG  
FIEADGSFQVRSLSFELVQFTIMQEIATFLQYRLRTSKNIRDYLVKTKYDFKDWCKVLSY  
>lcl|Q6U7Z5\_CRIPE/65-197 (Q6U7Z5)



FTDAEGCFNVSALNYNIKMSILRIIKSFLATGFKSMISYFKVFLPKKAQSFNKWLAIHNI  
>lcl|Q2EJ90\_CANPA/47-179 (Q2EJ90)  
FLQWFIGFFEGDGSFILGAIIIKIDRVNLEYIQSNMGNICIAWSITNLISLFLRLVFFIKFISELNYWLSG  
FTDAEGCFASRVRYILSQKYVLEHILSEFCIKLFFYKVLQSIINNTKRVILKELCKTINK  
>lcl|Q2LCQ1\_DICCI/37-169 (Q2LCQ1)  
FLIWFIFGVEGDSCFQVSDLLFVNVIEVLEIQKVGFLVTSRFCVQDLIILFMRQVRFKAFLDIYNWISG  
IVDSEGGFISNIIIFCISQEQENPKLKFVGVKNTLTLPLKQYFENTKQKSYLWLNLR  
>lcl|A15B\_YEAST/88-220 (Q9ZZX0)  
KGYLGLFEGDGNITRCFSITFDVLLANLYLCTYKIGHITAKWNIMKVFMMILRYDQYFKYFNRRPWL TG  
FNDADGYFYTGKHFLELSQSYILDIIKKFYAYIYKAQKPFIEYFNRRYKQYLLLNIAAYLL  
>lcl|Q3ZEH1\_EPIFL/83-215 (Q3ZEH1)  
WLTWIFGTEGNGAIQTYRIRFVLESKILYEVQYKNIQVKKRWIVDNLAFRLIEQLTKWVNALNGWLSG  
FTDAEGCFNVSAMRYILNQSMILKINKLKVYRYVTNDIITYFKIKKAIISFEKWL YIHNQ  
>lcl|Q3T4A7\_SMICU/75-207 (Q3T4A7)  
FGYLAGLIEGDGYFGKLEIIFNDISLAYFIKKGYGNIYKYYLSHKVLDTFKIDQLIKYSYNTKYWLAG  
FSDADSSFCITRLEFKIKQPTILKIKFEFYCYNSTKNIYFNDSKYREYFRWRKAYRI  
>lcl|A7KCU1\_PLEOS/97-229 (A7KCU1)  
FGYLAGLIEGDGWFHGHKIIFAEDISLAYSIKNRGHGNVYKRYICKNIILSILKYEQLIKHNSYDNHWLSG  
FTQADGCFYISRLFEFSIKQNIPLKLLFETVIMCYKSALLINYFDTGKYTNLFRKRVYIL  
>lcl|Q8HIS7\_MONBE/64-196 (Q8HIS7)  
FNQYLAGIIDGNLLEISETMDSERCLAYLTKSSGSIKARYVQDLINIIKIKQLKILCEHFAYFSG  
LFDVNGTITCFYLSVFSKNLNIWVLFNGNSYKTIKKQDIIFLYQTKNNPLRTLKQSRI  
>lcl|B8R1A7\_VOLCA/92-224 (B8R1A7)  
FLAWLVGFLIEGDGSFARLKYVEIDVLIHKIRSTGFGITQKYWRYYNVALRQIQFEWVKLNAWLAG  
FIEADGCFYTNFLKMHITQLAAIRDLFGATRVEITAYNNIYDFKKKKIDYQWRVVRVHGY  
>lcl|Q02673\_PODAN/40-172 (Q02673)  
WLGWVGFSEGDGYLGINRPVFLVLSKILHEIRDIQFVYKDRFIVRDLFYFLKINQLIRWSSLLNSWLSG  
FVDAEGCFNVYSLRFIVDQLSLFNDLRDLNRYFAITRLVIEYFNVRTKKTISIKWMSLIL  
>lcl|Q6U7X9\_CRIFE/112-244 (Q6U7X9)  
FRSYLAGLIEGDGCIWPIITFSDFLPLAMIQQKATGHIYKYRISNKFIDIMKLDYLNKNGYSIAWLAG  
FIDSDFHFSVRACSLIEICQKDLISNSYFNQYRIRITLVLMLGYSKYLKDYKDWNLVLT  
>lcl|B3V4M7\_OEDCA/9-141 (B3V4M7)  
WNEWLAGITDGNVYFVNSFEITDAKLLYNIKNTGGGSVVKRYRICKEDILNMLNHRRIAQFHQACTAYLAG  
LIDSYGTITIGYISRGYHQIEMIQESYGFYEEFSLIRLPIIYFKPELKQWEKFCRLWHK  
>lcl|Q3ZIZ2\_PSEAK/49-181 (Q3ZIZ2)  
FLEWVGFTEGDGCFQIFRCSFIIDIALHKKIRTLGFGVEIMRYSVQSRALFNLFRHKKVFKMSWLSG  
FIDAEAGCFYARIRKFLSNQNLVKNTRGRVQIILDYLIQIYRQLNKKIQRFNCRCKLNN  
>lcl|Q950M1\_9FUNG/122-254 (Q950M1)  
FLEWVGFVEGDGSFVSDLTQDLIDLHHIRTKGFGKILYVYITGKLSFLKKEQFNKWLIVFNWLSG  
FIDAEAGCFISRLTDFSIQTLERIRNIIILVNGYEFYLSKILIHYSILIKRIQFQWNSKIHLE  
>lcl|A15\_USTMA/294-426 (Q0H8Y1)  
FLEWVGFTEGDGFSIVSNLMFVIDQLVHYIEQEGFRVIRKRFIVQDILIQFKQNSFFKVFHFNWFCG  
FTDARGCFTCSRFRLLTQLISIANLMKGTVEITVNEKIIDYFTNKKAKSYQIWLIEIYES  
>lcl|B9W1R8\_GLOIN/71-203 (B9W1R8)  
WLNWLTGLIEADGFFNETLSFYINAPLIYALKYWFGKVRWHFVIEDILANILKYEAYVKNINRNFNWL  
FTEGNGSFFIQQVTLNISWLELFAFQKGCWYNIKHLFSVFAIDIKKYDYFDLKRACEL  
>lcl|Q02679\_PODAN/54-186 (Q02679)  
IYWLGLIEGDGHSVPSSGINTKIEIIFALKDTSAEFLKIFRIPEFVNFVIFKDYTLCKLIDFLNPWLAG  
FIDADGFSIKGFLYLAQMQIISNFKSKQFVNTSLILVDYLTTSKYLDKFKWCKLKM  
>lcl|Q6ED53\_CANZE/513-645 (Q6ED53)  
FWEWLAGMIDGKGNFDRITIRIKDLRMLTRIQNKHMGRINTLWMMSTYMINLIKYNDFMKS CNLNPYLSG  
LIDTDGSMFNSLLFKYKNDVMPNYSYPYRCKMKNRFLITKMPYFMQMRKFYKSKNIKEYLL  
>lcl|A5J077\_GIBZE/52-184 (A5J077)  
LGYLAGLIEGDGSIPLRIVFTSNIGMSYFISQENIGRFQYIIGDILFINVLKNQRFNDLINFMSWFSG  
FSEADGHGFIKAAIFAAPNSETRKRVSLENKTYKNNSFLIDYFNKDKLTDFFKWEIVYNN  
>lcl|A5J068\_GIBZE/88-220 (A5J068)  
FNNWFAIIGDGNFDIRQIRIKLDIRILTHIQNYHIGRIRAPYSIYIYLEIIVPVGFEACALYNPYAG  
LIDTDGSIIVFNKLNFDNLTPTIIRKRSNSIYDYFMHSHKIPFEIEIHKIYSDFMINWIK  
>lcl|Q6UVS2\_PSEAK/27-159 (Q6UVS2)  
SYPFIAGLIDGDGHIIVFYVITMDELFLNELQQQGYLKKVARFHLNAELTKLINTIRVEQFKICTGYIAG  
LFTADGTAFLNRLSAAAKDELSPLEIKIQFSKGLDRIEIVQFYEYKRLDLMEQFFMLRE  
>lcl|Q3T4B2\_SMICU/82-214 (Q3T4B2)  
FSYLAGLIEGDGTIIVPSIQIVFDLPLALIIQKNGLSISKRLTINNKLTCLFKIYFNELIKFLNSWLSG  
FIDADGHVNSCRFELVQNDKDIMIKLAQYNINITLIIISNYLLKSKFLNFKDYKVLIL  
>lcl|Q950R8\_SPIPN/56-188 (Q950R8)  
LGHRLAGLFEAEGSLDVYPYQIVFDLPYFTRLVQIQLGDSNAAAILNVRLIICLLRISTLERAIQWYAGWFS  
FSCGDSFCGIETYQLQSQPLIMESINTEISKKFRVRIILVSYFSQSKRLDYLDWLEAYKL  
>lcl|Q8HIS6\_MONBE/14-146 (Q8HIS6)  
YLDWLAGITDGDGCFIISELTVETNLKCLYRIKTVGNIKPKGRYKLNHNINLVNRPVRLQLDKVCANWLSG  
FFDADGSIYINQVIFISISQYLLDQIAFVYIEVLANMTANLIPSIEYELNMVEEKKWELLEK  
>lcl|O47489\_CHLVU/25-157 (O47489)  
DHWHLAGLIDADGGFVYSSCEITMEVQTLFFIKKHGVSQRRRWRHLQRLLKLFTRVANQFQVQCEWFSG  
FFSGDGSFINQPAIAISQKQILDEIASVVFQKFSRLRKSIMRFLGRGLHRDPKSQKRLHH  
>lcl|Q02687\_PODAN/89-221 (Q02687)  
FAYYIAGLIEGDGTIIVPSIQIVFDLPLALLIQKEGHGSIIRIYVNSLFINLMIKIFALHKLIDWYNAWLSG  
FIESDGHFSLRECKFELSQEIEAISLSYVQYRIRTLAVVDYLTCKLDFNDWAKVGV  
>lcl|O21044\_DICDI/9-141 (O21044)  
QLGWVAGLDSGCMFNSNIEIKLDYECLENMKTGAVKVSRRYRLNHLLEIIPVRVKVKEVCEAWLSG  
FFDVGSIINQVLVFNQQLIKIQRIVGTSKEEILNKRIQLIPQDNQLQETLWKFMIQ  
>lcl|VS73/4-136 A 0|gi 0  
SPWITGFADAESSFMLTRFIRGLDVTILKSIREYGAGIITSRIRFESVVINFPKRADYLLFKKAFYNWVAG  
FTAGEGSFYIRQSVFIQTIELMKNLISYLCVDLVTEKIIIPFNKVKLQYRDWCKVTL

>gi166957894|gb|AA59060.1|/423-555 ribosomal protein 3/homing endonuclease-like protein fusion [Ophiostoma novo-ulmi subsp. americana]  
NPWILTFGDAEGSFLRRGFIITLTKSILENIQSTKVGVIANVTRFEDVVIDFPKLDGYMLFKQAFCKNLGAG  
FTSGEGCFVNVQLVFSITQKLNLSLITYLWLDVFTDKIIPVQEVKLEDFEDWCKVAKL  
>gi1257097894|gb|ACV41167.1|/415-547 ribosomal protein 3/homing endonuclease-like fusion protein [Leptographium truncatum]  
SPWITGFDAAESSFVMLTRFRIGLVDITLKSIREYGAGIITSRIRFESVFINFPKRADYLLFKKAFYNWVAG  
FTAGEGSFYIRQSVFQITQIELMKNLISYLCVDLVVTEKIIPFFNKVKLQDYRDWCKVVTL  
>lcl|CPA4\_AF029891.1|/42-174  
NPWFITGLVDAEGSFVNEIALNEDRDLLTGIQDYGIGNITFTFKLVIVIRFYNVPIQLFSRVGWWLAG  
FTEGESCFIPQLAFTITQKELLNVAIQFLACDFIVNKKIIPFFNKTKSLNYQDFVKKVFL  
>lcl|HJE2\_AF447590.1|/5-137  
DPNFLTGFDAEGSFVLSRFSISLDFVLEAIKNGVGEIYTYQYRVFSLVIDFPKFGDYSFLKQAYLQWLAG  
FTSGEGSFGVKELIFQINQKQLMACIAEYLAIVYRVSEKVIIPFFIKKALDFKDFCSLAEL  
>gi1257097864|gb|ACV41152.1|/186-318 ribosomal protein 3/homing endonuclease-like fusion protein [Grosmanina piceiperda]  
DPWITGFDAAESSFVVSQIALSQDLALLERIKSYDAGNIYIDWHVTSIILDFPKLADYLLFKKEVFNWVAG  
FTEGEGCFVSVSLIFQITQIVLMQNIKFLAVDILVTEKVIIPFFESLKLKNFTDFSKAADI  
>gi134538660|gb|AAQ74268.1|/39-171 intronic ORF at intron 1 of nad4 [Moniliophthora perniciosa]  
DPWITGFDAAESSFVVSQIALSQDLALLERIKSYDAGNIYIDWHVTSIILDFPKLADYLLFKKAFYNWVAG  
FTSGEGFMIDGLRFTITQKQMLISLIDFFCNLTIRTKIIPFFSKDKLLNFQNFIEASKL  
>gi1466464|gb|AAC48982.1|/134-266 ORF1 [Sclerotinia sclerotiorum]  
NPWFLTFIDGEGCFRISFFQINLIDALLEDIRDYGVGMHKKRIQTFDILINLKKWDFELFKQAEHWFVSG  
FTSAEGCFMVGYSFIVTQELLKCLIDYFVVEYQVSEKIDFFDKKESKDYLDFTVSEI  
>gi1156106283|gb|ABU49446.1|/102-234 unknown [Phaeosphaeria nodorum SN15]  
NPGVWSGLIDGEGSFIIELEKFLQDLNLLCLLQHLGGIGSIRDMVNYNLLPKAADFLLLKKAWEYIWSG  
FVSAEGNFVDRQLRFRISQLMLQKIVEYLSISLITVNLVPPFDEIKLHDYLDWCKIHS  
>gi186142508|gb|ABC86623.1|/134-266 LAGLIDADG endonuclease [Gibberella zeae]  
DPSYITGFDGEGSFLTRFVSLDLVLLNSLKNFTGVSFLQYRVESIINFPKQADYMLFKLAYNLWLAG  
FTDAEGCFVSVKLSFIITQEFILKSLIEYLAIDFKVNSIIPFYDKNKSDFKDFSRVVTL  
>gi17159925|emb|CAA38767.2|/143-275 Dod ND3 i1 grp IC protein [Podospora anserina]  
NPSYISGFVDGEGSFLTRFVSLDLVLLNSLKNFTGVSFLQYRVESIINFPKQADYMLFKMAHNFVLSG  
FVDAEGCFVSVKLSFIITQEFILKSLIEYLAIDFKVNTIIPFFIKNKNLDFDFCEVRL  
>lcl|CPAI\_AF068139.1|/7-139  
NPWVVTGLVDAEGSFNITRLEMSRFTLEQLINFGGGGIRVRFYIESTVINFPKQEDYLLFKQVFEWLAG  
FTSGDGNFYISQLVFTLQQAQMLNSLISYLWQFIVTEKIIPFFKKEKDFQDWCRAAEL  
>lcl|IPANI\_X55026.1|/24-156  
NPWIVVGSDAESSFMIRVFSIAVDLFLLESIKTFGLGSIKSYRIESFIIPFPKLDGYLLFKKVVENWLAG  
FVSGEGCFKSIILIFQVTEKLMESLISYFVLSYIVSTKIIPFFLQSKNLDNFNDWCKIATL  
>lcl|SCUI\_AY863213.1|/9-141  
NPNWVTGFTQADGCFNITRFIISQDELLILSIKNFNGCIIKVNINDIIPFPKYTSYLIFKNIIENFIGG  
LIQDGGCFNISQAQLFIAQIELEISIKKFFMSIIEIKNKLPLFNEKDKQFIIFKQIVNL  
>lcl|IMVEI\_AY863211.1|/8-140  
LTWFITGLTEAEGCFNIRFSIAVDLELLKLVKDCNGTISERYFTVSIIPFLKLLDFEDVWLAANNYSIG  
FIAGDGSINIHSIFLSITQLFLMNEIKDFVSVQLLIESTLIPFFNKIKLNLNKKIILEL  
>lcl|AABI\_AF284855.1|/12-144  
NPWFLTFIDGEGCFRISFFQINLDRALLESIKDYGVGKIHIQYRIQITILKLPKRDFELFNTAHKHWLGS  
FASAEGCFMVGYSFTILTQEFMLKCLVDYFVVEYQVSEKLVFFDKKAKADLDFDCSVSDL  
>lcl|GZE2\_DQ364632.1|/6-138  
NPWFVTGFDAAEGSFMIHQIKLDIDLLEEKIYNTGSINTVYKVSIIISFNKKADFELFKLIINEMAG  
FVSGEGSFSVSYLSFRVSQKLLKSFVDFIFVTRFKDKIIPLFNEVKYKDFKDWLVAKM  
>lcl|GZE3\_DQ364632.1|/7-139  
NPWFITGFDGEGSFTISTFTIGLDLILQFKAYNAGKIYKYITIGSHVLPFPKLDYLVFKRILLDLWLAG  
FITAEASFFISSLVFSLQDLKRIADSLVITKSQKLTPLLSKVKLLDFERFKKASIL  
>lcl|SMAI\_CB161310.1|/122-254  
NPWAVVGFDAEGSFVVRISVTVLFLLESKTFGLGSIKSYRIESIILPFSKLDGYLLFKKVEFWLAG  
FVSGDGSFKSIILVFQITQVKLMESLISYLYVTNFGKIIPFFHQSKYGYDMWCKIALI  
>lcl|AAEI\_U54637.1|/8-140  
NPWFITGFDAAEGSFVMSFAIHDISLNLQIQTKTGVGNVRKLFVNDVNIINFPKASDYIIFKCYNYWISG  
FASGDSFVSRLIFGTCLKELLIGMANYFKYKYNDDIIPFFNKVHLDYDFKLIISNL  
>lcl|APAI\_AF538042.1|/10-142  
TPFFVTGTDGEGCFVGVFSITLDEALLKQLLSFGKGGIFRRFESKNVAVKFPKQADYLLWKKAVEEMAG  
FISGEGCFIVEKIFNIPQIILLQVLENYLMEFRFQEQIIPFIRSMKIHDFNDWCQAIDI  
>lcl|CPA3\_AF029891.1|/10-142  
NPWFLTFGSDAEGSFSILVFAIGLDELLEKRIQSYGVGKIHIQFRIDSVIINFPKWADYLLFKKALDNWISG  
FASGDSFNVKQLRFIQLKALIQYLVAIFYARFVVDKIIPFFDKKSLDYINFKVADI  
>lcl|LTR2\_ADN05145.1|/11-143  
LNWYICGLVDAEGSFGVNELAMNSDKLLELTKTNIYHNPSKFKVNSKIIPFTRKGDYLLFKKAVVERWLAG  
FIEGEACFVSVQLVFKITQKILIESIVELDFVTSINYIIPFFNEQKLNKNEYDFKLIIFDM  
>lcl|INCR2\_K02655.1|/9-141  
NPDIYITGFDGEGCFSLSIFISLIDISLLEAIQRTKVGKIYQYRVSSIITDFPKRVYLLFKQAIANWIRG  
FIEGEGCFQVWLRFSLTQEEELKDIAIYLYLITIFNKLIPFLKEVKQEDFLDFVIAKAL  
>lcl|IPAN4\_X55026.1|/14-146  
FAYYIAGLIEGDGTHVPPQIVFHLDLPLALLIQKEGHGSIIRIYTVNSLFINLMKTNKIFALHKLIDAWLGS  
FIESDGHFSLRECKFELSQLNFFLEEIAISQYRIRTTLAVVDYLLTKKLDNFNDWAKVVG  
>lcl|EJEI\_AB027341.1|/7-139  
NPWFITGFDAAEGSFSILKYTTGWLDLNLNIQAYGIGKIHIQFRVDSVINFPKLDYLLFKKAFANWAG  
FASGDSFNVKQLRFAIELKNLQHLISAYFRFQIVNSYKIIPFFKKSLLDFISFKEVALI  
>lcl|CKAI\_AB027347.1|/16-148  
NPWFISGFDGEGCFRISFFQITLDKLLESIKNGVGVKVIQSFTEAILNPKRADYELFKKAYYHWLIG  
FVSAEGCFVGVYTFIITQEQMLNSLIEYLEYQVSKYKIIPLFNKQYEDFKDFEKVAI  
>lcl|OHEI\_AB027349.1|/10-142  
FFFFYIHKKTAEGSFSILIFTIGLDLNLKIQSYGIGKIHIQFRVDSVINFPKLDYLLFKKAFDNWAG  
FASGDSFNIKQLRFAIELKDFVEHLPAYFRFQIVNYDKIIPFFKKSLLDFISFKEVALI  
>lcl|DCII\_DQ336395.4|/13-145



WLEWFIGFVEGDGSIYIDYFVIRQEIKILEEIQKTGFGNVKSKYIVTDLLAHFIQVSQLITLINLKRWLSG  
FTDAEGCFNITRAKFILDQQVLLKQICTLFIYRYLTDEKIIDYFTQKKQSFENWQLVYKK
